# Supplementary material for: Self-sampled specimens demonstrate comparable accuracy and consistency to clinician-sampled specimens for HPV detection among men who have sex with men in China
Source: HighWire-hosted journal article supplement (doi:10.1136/sextrans-2022-055408), 2022-05-09
Supplement: sextrans-2022-055408supp003_data_supplement.xlsx [file sextrans-2022-055408supp003_data_supplement.xlsx]

## Sheet: Sheet1
A	B	C	D	E	F	G	H	I	J	K	L	M	N	O	P	Q	R	S	T	U	V	W	X	Y	Z	AA	AB	AC	AD	AE	AF	AG	AH	AI	AJ	AK	AL	AM	AN	AO	AP	AQ	AR	AS	AT	AU	AV	AW	AX
2020-04-28	23	1	1	PS190339002	PS190339001	0	1	0	0	2	1	3	1	1	0	0		3	3	0			1	1	1	3		0	0	0					3	3	3	3	3	3	3	3	3	3	3	3	3	3	3
2020-04-29	34	1	1	PS190339004	PS190339003	0	1	4	0	5	1	2	0	1	0	1	1	4	3	0			1	3	1	0	4	0	0	0					4	4	3	3	2	4	4	4	2	2	2	2	2	2	2
2020-05-03	29	1	1	PS190339006	PS190339005	0	2	3	2	10	0	3	1	0		2	3	2	3	2	3	1	0		1	1		0	0	0					1	1	1	1	1	5	5	5	1	1	1	1	2	1	1
2020-05-05	30	1	1	PS190339008	PS190339007	0	1	3	0	1	0	3	1	0		0		1	3	0			0		1	2		1	0	0					2	2	2	3	3	4	4	4	2	2	2	2	3	2	2
2020-05-05	24	1	1	PS190339010	PS190339009	0	0	3	0	1	0	2	1	0		0		1	3	0			0		1	2		0	0	0					3	3	3	4	3	3	4	4	3	3	4	4	3	4	2
2020-05-07	29	1	1	PS190339012	PS190339011	0	0	0	3	1	1	3	1	0		1	3	0		0			0		1	1		2	0	0					3	3	3	2	2	4	4	4	4	3	2	5	2	1	1
2020-05-11	25	1	1	PS190339014	PS190339013	0	1	4	0	2	1	3	1	1	1	1	3	0		0			0		1	1		0	0	0					1	1	1	1	1	5	5	5	1	1	1	1	1	1	1
2020-05-12	27	1	1	PS190339016	PS190339015	0	1	3	3	12	0	3	1	1	1	0		0		0			0		0					0					3	3	3	3	3	3	3	3	3	3	3	3	3	3	3
2020-05-14	28	1	1	PS190339018	PS190339017	0	1	3	0	1	2	3	1	1	0	1	3	0		0			0		1	0	4	1	0	0					3	3	2	4	3	4	4	4	2	4	3	3	2	2	2
2020-05-19	29	1	1	PS190339020	PS190339019	0	1	3	0	5	2	3	1	1	1	0		0		0			0		1	2		0	0	0					1	1	1	1	1	4	4	4	2	3	2	3	2	2	2
2020-05-20	40	1	1	PS190339022	PS190339021	0	1	4	0	5	0	3	1	1	0	2	3	2	3	0			0		1	4		2	0	1	0	2	0	0	2	2	2	2	2	2	2	2	2	2	2	2	2	2	2
2020-05-20	34	1	1	PS190339024	PS190339023	1	1	3	2	2	2	3	1	0		2	3	0		0			0		1	2		1	0	0					3	3	3	3	3	4	4	3	1	2	2	2	2	2	2
2020-05-22	36	1	1	PS190339026	PS190339025	0	1	2	3	2	2	3	1	1	1	2	3	1	3	0			0		1	2		1	0	0					2	3	2	2	3	5	4	4	3	3	3	3	3	3	3
2020-05-22	36	1	1	PS190339028	PS190339027	0	1	4	0	3	0	1	1	1	1	1	2	1	2	0			1	4	1	2		2	0	1	1	2	0	0	4	4	3	4	4	4	4	4	3	3	3	3	4	3	3
2020-05-23	28	1	1	PS190339030	PS190339029	0	1	4	0	3	2	3	1	0		3	3	3	3	0			0		1	2		2	1	0					4	3	4	2	3	5	3	3	2	2	2	2	2	2	2
2020-05-24	27	1	1	PS190339054	PS190339053	0	1	3	2	1	2	3	1	1	1	1	2	0		0			0		1	2		2	0	0					3	3	3	3	3	4	3	3	2	2	3	3	3	3	3
2020-05-24	30	1	1	PS190339034	PS190339033	0	0	1	2	2	1	1	1	1	1	0		0		0			0		1	2		0	0	0					3	2	1	2	1	5	5	3	3	3	3	3	3	3	3
2020-05-24	40	1	1	PS190339032	PS190339031	0	1	3	3	2	2	3	1	1	1	1	3	1	3	0			0		1	0	0	2	0	0					4	4	3	3	3	4	4	4	2	2	2	2	2	2	3
2020-05-24	20	1	1	PS190339036	PS190339035	0	1	0	0	3	1	2	0	1	0	0		2	2	0			0		1	4		0	0	0					1	1	1	1	2	5	5	5	2	2	2	2	2	2	2
2020-05-24	35	1	1	PS190339038	PS190339037	1	1	3	0	3	0	3	1	1	0	0		0		1	3	1	0		1	2		0	0	0					5	3	5	5	5	3	3	3	3	3	3	3	3	3	3
2020-05-24	25	1	1	PS190339040	PS190339039	0	0	1	0	4	0	2	1	1	0	2	2	2	3	0			1	4	1	0	4	0	0	0					1	1	1	1	1	5	5	5	3	3	3	3	3	3	3
2020-05-24	25	1	1	PS190339044	PS190339043	0	1	2	2	3	2	0	1	1	1	3	3	3	0	0			0		1	1		1	0	1	1	2	2	0	2	2	2	2	2	4	4	4	3	3	2	3	2	3	3
2020-05-24	32	1	1	PS190339042	PS190339041	0	1	3	0	10	1	3	1	1	0	1	2	2	3	0			0		1	0	4	0	0	0					1	1	1	2	2	5	4	4	2	2	2	3	3	3	2
2020-05-24	45	1	1	PS190339046	PS190339045	1	0	3	2	5	1	1	0	1	0	0		0		1	1	0	0		0					0					2	2	3	3	3	2	2	2	3	3	3	3	3	3	3
2020-05-24	33	1	1	PS190339048	PS190339047	1	2	4	0	2	2	2	1	1	0	2	2	0		0			0		1	2		2	0	0					2	2	2	2	2	4	4	4	2	2	2	2	2	2	2
2020-05-24	23	1	1	PS190339050	PS190339049	0	1	3	0	4	0	2	1	1	0	1	2	3	2	0			1	2	1	2		1	0	0					3	1	1	1	1	5	3	4	1	1	1	3	2	1	1
2020-05-24	25	1	1	PS190339052	PS190339051	0	0	3	0	1	1	3	1	0		0		0		0			0		1	0	0	2	0	0					1	1	3	1	5	5	5	5	3	3	1	3	3	1	1
2020-05-24	38	1	1	PS190339056	PS190339055	1	1	4	3	1	1	3	1	1	1	1	3	1	2	1	2	1	0		1	1		2	0	0					1	2	2	2	1	4	4	4	1	2	1	1	2	1	1
2020-05-24	43	1	1	PS190339070	PS190339069	0	1	2	0	1	0	3	1	1	0	1	3	0		0			0		1	2		0	0	0					2	2	2	2	2	4	4	3	3	3	3	3	3	3	3
2020-05-24	21	1	1	PS190339058	PS190339057	0	1	0	0	3	2	2	0	1	0	1	2	0		0			0		1	0	4	0	0	0					2	1	1	1	1	5	5	5	1	1	1	1	1	1	1
2020-05-24	35	1	1	PS190339060	PS190339059	0	1	4	0	3	2	1	0	1	0	1	1	2	2	0			0		1	0	4	0	0	0					1	1	1	1	1	5	5	4	1	3	5	5	4	4	3
2020-05-24	33	1	1	PS190339062	PS190339061	1	1	3	2	1	0	2	0	1	0	1	1	0		0			0		1	2		0	0	0					2	2	2	2	2	4	3	4	2	2	2	2	2	2	2
2020-05-24	32	1	1	PS190339064	PS190339063	0	1	3	0	1	1	3	1	1	1	1	3	1	3	1	3	1	0		1	2		0	0	0					1	1	1	1	1	4	4	4	2	2	2	2	2	3	2
2020-05-24	27	1	1	PS190339066	PS190339065	0	1	3	0	3	2	3	1	1	0	0		3	3	0			0		1	2		1	0	0					1	1	1	1	1	5	4	4	1	1	2	1	1	1	1
2020-05-24	22	1	1	PS190339068	PS190339067	0	1	2	0	3	1	2	1	1	0	1	3	2	1	0			0		0					0					1	1	1	1	1	5	3	5	1	1	1	1	1	1	1
2020-05-24	47	1	1	PS190339072	PS190339071	2	2	3	0	5	1	2	0	1	0	4	2	1	2	0			0		1	2		0	0	0					3	3	3	2	3	4	3	5	1	3	3	3	3	2	2
2020-05-24	49	1	1	PS190339074	PS190339073	2	0	3	0	3	1	2	1	1	1	2	2	3	2	0			0		1	4		1	0	1	0	2	0	0	1	1	3	3	3	3	3	3	1	1	1	1	1	1	3
2020-05-26	34	1	1	PS190339076	PS190339075	0	1	2	3	2	0	3	1	0		0		0		0			0		1	1		1	0	0					3	2	3	4	2	4	4	3	2	2	3	4	3	4	3
2020-05-27	21	1	1	PS190339078	PS190339077	0	0	3	2	2	2	2	1	1	0	2	2	2	2	0			1	4	0					0					3	1	1	1	2	4	4	4	3	3	3	3	3	3	3
2020-05-28	30	1	1	PS190339080	PS190339079	0	1	3	0	1	0	2	1	1	1	0		0		0			0		1	2		0	0	0					1	1	1	1	1	1	1	1	3	3	3	3	3	3	3
2020-05-31	30	1	1	PS190339084	PS190339083	0	1	3	0	1	0	0	0	1	0	1	0	0		0			1	1	1	2		0	0	0					1	1	1	1	1	5	3	3	2	2	2	2	2	2	2
2020-06-02	32	1	1	PS190339086	PS190339085	0	1	2	2	20	2	3	1	1	1	2	3	20	3	1	0	0	0		1	2		0	0	0					4	2	2	2	2	2	2	2	3	3	2	2	2	2	2
2020-06-03	30	1	1	PS190339088	PS190339087	1	0	4	3	1	1	3	1	1	0	1	3	1	3	1	3	1	0		1	2		0	0	0					3	3	3	3	3	3	3	3	3	3	3	3	3	3	3
2020-06-03	33	1	1	PS190339090	PS190339089	0	1	2	0	1	2	3	1	1	1	1	3	1	3	0			0		1	4		0	2	0					1	1	1	1	1	1	1	1	1	1	1	1	1	1	1
2020-06-03	26	1	1	PS190339082	PS190339081	0	2	0	0	11	2	3	1	1	0	0		0		0			1	1	1	2		0	0	0					1	1	3	1	2	5	5	5	1	1	2	3	4	1	1
2020-06-04	33	1	1	PS190339092	PS190339091	0	0	2	0	3	0	3	1	0		0		0		0			0		1	4		1	0	0					1	1	1	1	1	3	3	3	2	2	2	2	2	2	2
2020-06-07	41	1	1	PS190339094	PS190339093	2	1	3	0	3	0	3	1	0		0		3	3	0			0		1	1		0	0	0					4	3	2	4	3	3	3	3	1	2	3	3	2	1	1
2020-06-09	30	1	1	PS190339096	PS190339095	1	0	4	2	2	2	2	1	1	1	2	1	2	1	0			0		0					0					3	3	3	3	3	3	3	3	2	2	2	2	2	2	2
2020-06-09	25	1	1	PS190339098	PS190339097	0	0	0	2	2	0	2	0	1	0	0		2	1	0			0		0					0					2	2	3	2	2	4	4	4	2	3	3	2	3	3	3
2020-06-10	43	1	1	PS190339132	PS190339131	0	1	4	2	1	1	2	0	0		1	2	0		1	2	0	0		1	2		2	0	0					3	3	3	3	3	4	3	3	1	2	2	1	1	1	1
2020-06-12	35	1	1	PS190339158	PS190339157	0	0	2	0	3	2	3	1	1	1	0		3	3	0			0		1	2		0	0	0					3	3	3	3	3	4	4	4	3	3	3	3	3	3	3
2020-06-13	49	1	1	PS190339212	PS190339211	0	1	3	2	1	1	3	1	0		1	2	1	0	0			0		1	1		2	0	0					2	2	2	2	2	4	4	3	2	2	2	3	3	3	3
2020-06-13	31	1	1	PS190339154	PS190339153	0	1	4	0	2	2	3	1	0		0		2	3	0			0		1	2		1	0	0					1	3	1	3	1	1	1	5	1	1	1	1	1	1	1
2020-06-13	33	1	1	PS190339150	PS190339149	0	1	3	0	1	1	3	1	1	0	0		1	3	0			0		1	3		2	0	0					2	2	2	3	3	4	4	4	2	3	2	3	3	2	2
2020-06-13	41	1	1	PS190339156	PS190339155	2	1	4	3	1	1	3	1	1	0	1	3	0		1	3	1	1	4	1	2		2	0	0					5	3	3	3	3	3	3	3	1	1	1	1	1	1	1
2020-06-14	27	1	1	PS190339180	PS190339179	0	1	2	0	1	0	3	1	1	0	0		1	3	0			0		1	2		0	0	0					3	2	2	2	1	4	4	4	1	1	1	2	1	1	1
2020-06-14	34	1	1	PS190339182	PS190339181	0	1	4	0	1	1	3	1	1	0	0		1	3	0			0		1	1		0	0	0					4	1	3	3	3	3	3	4	1	1	1	1	1	3	3
2020-06-14	34	1	1	PS190339184	PS190339183	0	0	2	0	1	2	3	1	1	0	0		1	3	0			0		1	2		2	0	0					4	4	3	2	2	3	3	4	2	2	1	1	2	2	3
2020-06-15	43	1	1	PS190339134	PS190339133	2	0	2	2	2	2	1	1	1	1	1	1	2	1	0			0		1	2		2	0	1	1	2	0	0	4	2	3	3	3	3	3	3	4	4	4	4	3	3	3
2020-06-15	24	1	1	PS190339136	PS190339135	0	1	4	0	3	2	2	1	1	1	3	2	3	2	0			0		1	2		2	0	1	1	2	0	0	1	1	1	1	1	1	5	5	1	1	1	1	1	1	1
2020-06-16	24	1	1	PS190339138	PS190339137	0	1	3	0	2	0	3	1	1	1	0		1	3	0			0		0					0					2	2	2	1	1	5	5	4	1	1	1	1	1	1	1
2020-06-20	30	1	1	PS190339140	PS190339139	0	1	4	0	2	2	2	1	1	1	2	2	2	2	0			0		1	2		1	2	0					3	3	3	3	3	3	3	3	3	3	3	3	3	3	3
2020-06-20	36	1	1	PS190339144	PS190339143	2	0	3	0	4	1	3	1	1	0	1	3	2	3	0			0		1	1		0	0	0					2	1	2	1	2	4	4	4	2	3	2	2	2	2	2
2020-06-21	32	1	1	PS190339148	PS190339147	0	0	2	0	2	2	3	1	0		2	3	3	3	0			1	2	1	1		0	0	0					2	2	2	2	4	4	4	4	2	2	2	2	2	3	2
2020-06-21	45	1	1	PS190339146	PS190339145	0	0	3	0	2	2	0	1	1	0	1	2	0		0			0		1	1		0	1	0					3	2	2	2	2	5	4	4	1	1	1	1	1	1	1
2020-06-21	20	1	1	PS190339100	PS190339099	0	1	0	0	1	0	3	1	1	0	1	3	0		0			0		1	2		2	0	0					1	1	1	1	1	4	4	4	1	1	1	1	1	1	1
2020-06-21	26	1	1	PS190339102	PS190339101	0	0	4	2	1	1	3	1	1	0	2	3	2	3	0			0		1	0	1	0	0	0					5	1	1	1	1	4	4	5	1	1	1	1	1	1	1
2020-06-21	53	1	1	PS190339104	PS190339103	1	1	2	0	2	0	3	1	1	0	0		2	3	0			1	1	1	2		0	0	0					3	3	3	3	3	3	3	3	2	3	3	3	3	3	3
2020-06-21	34	1	1	PS190339106	PS190339105	0	1	3	3	1	1	2	1	1	0	1	1	0		0			0		1	2		0	0	0					2	2	2	2	2	4	4	4	1	1	1	1	1	1	1
2020-06-21	37	1	1	PS190339108	PS190339107	0	1	2	0	11	2	2	1	1	0	0		3	2	0			1	4	1	2		0	0	0					3	3	3	3	3	3	3	3	3	3	3	3	3	3	3
2020-06-21	32	1	1	PS190339110	PS190339109	0	2	4	1	3	2	3	1	0		0		3	3	0			0		1	2		1	0	0					5	5	5	5	5	5	3	5	1	1	3	5	1	1	3
2020-06-21	22	1	1	PS190339112	PS190339111	0	0	3	0	4	2	3	1	1	1	0		4	3	0			0		1	2		2	0	0					2	2	3	3	3	3	3	3	3	3	3	3	3	3	3
2020-06-21	23	1	1	PS190339210	PS190339209	0	1	3	3	1	1	3	1	0		0		1	3	0			0		1	2		2	0	0					2	2	2	2	2	3	3	3	3	3	3	3	3	3	3
2020-07-01	48	1	1	PS190339208	PS190339207	0	1	3	0	5	1	3	1	1	1	3	3	2	3	0			0		0					0					2	2	2	2	2	4	4	4	2	3	2	2	2	2	2
2020-07-02	22	1	1	PS190339206	PS190339205	0	1	3	2	3	2	3	0	1	0	3	3	2	3	0			0		1	4		0	0	0					2	2	2	2	2	3	4	4	2	3	3	3	2	2	3
2020-07-03	39	1	1	PS190339216	PS190339215	2	0	1	2	2	1	2	1	1	1	1	3	2	3	1	3	1	0		0					0					3	1	3	4	1	3	3	3	1	1	1	1	1	1	1
2020-07-05	30	1	1	PS190339298	PS190339297	0	1	4	2	4	0	2	0	1	0	1	1	0		0			0		1	2		0	0	0					4	3	3	4	4	3	3	3	1	2	2	2	2	2	2
2020-07-08	30	1	1	PS190339168	PS190339167	0	1	3	0	1	1	3	1	0		1	3	1	3	0			0		1	4		0	0	0					3	3	3	3	3	3	3	3	3	3	3	3	3	3	3
2020-07-08	29	1	1	PS190339192	PS190339191	0	1	4	2	1	1	3	1	0		1	3	0		1	3	1	0		1	0	3	0	0	0					3	2	2	2	2	4	4	4	3	2	2	4	2	2	2
2020-07-08	47	1	1	PS190339176	PS190339175	0	0	3	0	6	2	2	1	1	0	3	1	3	1	0			0		1	1		1	0	0					2	2	2	2	2	4	4	3	1	2	2	2	1	2	2
2020-07-11	21	1	1	PS190339204	PS190339203	0	1	2	0	3	2	2	1	1	1	0		0		0			0		1	1		1	0	0					4	1	1	1	3	5	5	5	3	3	3	3	3	3	2
2020-07-12	37	1	1	PS190339174	PS190339173	2	1	2	2	1	1	3	1	0		NA	3	2	3	0			0		1	2		2	0	1	1	2	0	0	2	2	3	2	2	4	4	4	1	1	1	1	1	1	1
2020-07-12	26	1	1	PS190339178	PS190339177	0	2	3	3	1	2	1	1	1	0	1	1	0		0			0		1	1		0	0	0					5	1	1	1	1	3	3	3	3	3	3	3	3	3	3
2020-07-13	25	1	1	PS190339152	PS190339151	0	1	3	0	2	2	3	1	1	1	3	3	2	3	0			1	3	1	1		2	0	0					3	3	3	3	3	3	3	3	2	3	3	3	3	3	3
2020-07-13	28	1	1	PS190339186	PS190339185	0	0	3	2	5	0	3	1	1	0	0		2	3	1	0	1	0		1	1		2	0	1	1	2	0	0	3	3	3	3	3	3	3	3	1	1	1	1	2	2	2
2020-07-16	22	1	1	PS190339240	PS190339239	0	1	0	0	2	2	2	1	1	0	2	2	2	2	2	3	1	0		1	2		1	0	0					1	1	1	1	1	5	3	5	1	1	1	1	1	1	1
2020-07-19	28	1	1	PS190339170	PS190339169	1	1	4	2	2	1	2	0	1	0	0		2	2	1	0	0	0		1	2		1	0	0					2	2	2	2	2	4	4	4	3	3	3	3	3	3	3
2020-07-19	25	1	1	PS190339198	PS190339197	0	1	1	3	2	1	3	1	0		1	3	1	3	0			0		0					0					4	4	4	4	4	4	3	3	4	3	3	3	3	3	3
2020-07-19	28	1	1	PS190339230	PS190339229	0	1	4	0	3	0	3	1	1	0	0		0		0			0		1	1		2	0	0					2	2	3	1	2	4	4	4	2	2	2	2	1	1	1
2020-07-19	47	1	1	PS190339202	PS190339201	1	0	2	0	8	2	3	1	1	0	0		8	3	1	0	0	0		1	0	4	1	0	0					3	3	3	3	3	3	3	3	3	3	3	3	3	3	3
2020-07-19	26	1	1	PS190339238	PS190339237	0	0	2	0	2	2	3	1	0		2	3	0		0			0		1	2		0	0	1	2	2	2	0	3	3	3	3	3	3	3	3	2	2	2	2	2	3	2
2020-07-19	26	1	1	PS190339196	PS190339195	0	1	4	2	3	2	3	1	1	1	1	3	3	3	0			1	2	1	4		2	0	0					2	1	2	2	2	3	3	2	1	1	3	3	2	1	1
2020-07-19	25	1	1	PS190339218	PS190339217	0	1	0	0	1	0	3	1	1	0	1	3	1	3	0			1	1	1	2		1	0	0					3	3	3	3	3	3	3	3	3	3	3	3	3	3	3
2020-07-19	30	1	1	PS190339188	PS190339187	0	0	3	2	3	2	3	1	1	1	2	3	3	3	0			1	2	1	2		2	0	0					5	3	3	3	3	3	3	3	2	2	3	3	3	2	2
2020-07-19	30	1	1	PS190339194	PS190339193	1	0	2	2	2	2	1	1	1	0	0		0		0			0		0					0					1	1	1	1	1	1	1	1	3	3	3	3	3	3	3
2020-07-19	45	1	1	PS190339200	PS190339199	1	1	4	2	1	0	3	1	1	0	1	3	0		0			0		1	2		1	0	0					3	2	3	3	3	4	3	3	2	2	2	2	2	2	2
2020-07-19	28	1	1	PS190339190	PS190339189	0	1	2	0	5	1	3	1	1	0	1	3	4	3	0			1	4	1	0	0	1	0	0					2	2	2	2	1	5	5	5	1	1	1	1	1	1	1
2020-07-19	31	1	1	PS190339236	PS190339235	0	0	3	0	1	0	1	0	0		1	1	0		0			0		1	1		0	0	0					1	1	1	1	1	1	1	1	1	1	1	1	1	1	1
2020-07-19	45	1	1	PS190339214	PS190339213	1	0	3	3	1	1	1	0	1	0	1	1	1	1	1	3	1	0		1	0	4	0	0	0					3	3	3	2	2	4	3	4	1	1	1	1	1	1	1
2020-07-19	39	1	1	PS190339224	PS190339223	1	1	3	0	10	1	2	1	1	1	0		5	2	0			0		0					0					2	2	2	2	2	4	4	4	2	2	2	2	2	2	2
2020-07-19	36	1	1	PS190339228	PS190339227	2	1	4	2	2	2	3	1	1	0	1	3	2	3	0			0		1	2		1	1	0					3	3	3	3	3	3	3	3	3	3	3	3	3	3	3
2020-07-19	30	1	1	PS190339232	PS190339231	0	2	4	0	1	1	3	1	1	1	0		0		0			1	2	0					0					4	3	4	5	4	3	4	4	4	4	4	4	2	1	1
2020-07-19	41	1	1	PS190339234	PS190339233	0	1	4	2	1	1	3	1	1	0	1	3	1	3	0			0		1	0	4	2	1	0					1	1	1	1	1	3	3	3	1	1	1	1	1	1	1
2020-07-22	37	1	1	PS190339250	PS190339249	0	0	2	2	5	1	2	1	1	1	1	2	1	2	0			0		1	1		2	0	0					3	3	3	3	3	3	3	3	3	3	3	3	3	3	3
2020-07-22	22	1	1	PS190339272	PS190339271	0	1	3	0	4	2	2	1	1	1	1	2	3	2	0			0		0					0					5	2	2	2	2	4	4	4	2	2	2	2	2	1	1
2020-07-23	35	1	1	PS190339268	PS190339267	0	1	2	2	1	2	1	1	1	1	1	1	1	2	0			1	1	1	1		0	2	0					3	3	3	3	3	4	3	3	2	3	3	3	3	2	2
2020-07-23	33	1	1	PS190339266	PS190339265	1	0	2	2	2	2	3	1	1	1	0		2	3	0			0		1	2		2	0	0					4	1	1	1	1	1	4	4	1	1	1	1	1	1	1
2020-07-24	38	1	1	PS190339270	PS190339269	0	1	4	0	2	2	0	0	1	0	2	0	1	0	0			0		1	2		2	0	0					1	1	1	1	1	4	4	4	1	1	1	3	2	1	1
2020-07-25	21	1	1	PS190339274	PS190339273	0	1	1	0	8	0	3	1	1	0	2	3	8	3	0			0		0					0					4	4	4	4	4	5	5	5	3	3	3	3	3	3	3
2020-07-25	20	1	1	PS190339264	PS190339263	0	0	3	0	1	2	1	1	1	1	1	1	0		0			1	0	1	1		2	0	0					2	1	1	1	1	4	3	3	1	3	2	3	3	2	2
2020-07-26	24	1	1	PS190339276	PS190339275	0	1	3	3	2	2	3	1	1	1	1	3	0		0			0		1	2		0	2	0					4	2	2	2	2	4	3	3	2	2	2	2	2	2	2
2020-07-26	29	1	1	PS190339278	PS190339277	0	0	4	0	1	0	3	1	1	0	1	3	1	3	0			1	1	1	4		1	0	0					4	3	3	4	3	4	4	4	2	3	2	4	2	2	2
2020-07-29	23	1	1	PS190339262	PS190339261	0	0	3	0	1	2	2	0	1	1	1	1	0		0			0		1	1		0	0	0					3	3	2	3	3	3	3	4	4	4	3	3	3	2	3
2020-07-31	49	1	1	PS190339172	PS190339171	0	0	2	0	1	1	3	1	1	0	0		1	3	0			0		1	2		0	0	0					2	2	2	2	2	4	2	4	2	2	2	2	2	2	2
2020-07-31	47	1	1	PS190339260	PS190339259	0	1	4	2	1	1	3	1	0		0		1	3	0			0		0					0					2	2	2	1	2	4	4	4	2	2	2	3	2	2	2
2020-07-31	35	1	1	PS190339258	PS190339257	0	1	3	3	3	1	3	1	1	0	1	2	0		0			0		1	0	4	0	0	0					4	4	3	4	4	4	4	4	2	2	2	2	2	2	2
2020-08-01	22	1	1	PS190339252	PS190339251	0	1	4	3	1	2	3	1	1	0	0		1	3	1	3	1	0		1	1		2	0	0					1	1	1	1	1	5	4	5	2	2	2	2	2	2	1
2020-08-02	32	1	1	PS190339290	PS190339289	0	0	3	2	2	2	1	1	1	1	0		2	1	0			0		0					0					3	3	3	3	3	3	3	3	3	3	3	3	3	3	3
2020-08-02	23	1	1	PS190339280	PS190339279	0	1	2	0	1	2	1	0	1	0	1	1	0		0			0		1	2		2	0	0					1	1	1	1	1	3	3	3	2	3	2	2	2	2	2
2020-08-05	49	1	1	PS190339256	PS190339255	2	0	4	0	2	2	3	1	1	1	2	2	0		0			1	2	1	2		2	0	1	1	2	0	0	2	2	3	3	3	3	3	3	3	3	3	2	3	3	3
2020-08-05	27	1	1	PS190339254	PS190339253	0	2	4	2	2	1	2	1	1	1	0		2	3	1	2	1	1	1	1	0	2	0	0	0					5	5	5	5	5	5	3	5	1	1	1	1	1	1	1
2020-08-05	35	1	1	PS190339282	PS190339281	0	0	1	3	1	2	1	0	1	0	1	1	0		0			0		0					0					3	3	3	3	3	3	3	3	3	3	3	3	3	3	3
2020-08-05	24	1	1	PS190339284	PS190339283	0	1	3	0	1	1	1	0	1	0	1	2	0		0			0		1	4		1	0	0					2	2	2	2	2	2	3	3	1	1	1	1	1	1	1
2020-08-08	25	1	1	PS190339296	PS190339295	0	1	4	0	10	2	2	0	1	0	1	2	9	2	0			0		1	2		2	0	1	0	2	0	0	1	1	1	1	4	5	5	5	2	2	1	1	1	1	1
2020-08-09	40	1	1	PS190339222	PS190339221	1	0	2	2	1	1	3	1	1	1	0		1	3	0			0		1	4		1	2	0					4	4	4	4	4	4	4	4	3	3	3	3	3	3	3
2020-08-09	35	1	1	PS190339294	PS190339293	0	1	4	2	1	2	3	1	1	1	0		1	3	0			0		1	2		2	0	0					4	4	4	3	4	4	3	3	2	2	2	2	2	2	2
2020-08-09	20	1	1	PS190339220	PS190339219	0	1	2	2	10	2	2	1	1	0	2	2	8	2	1	0	0	0		1	0	0	0	0	0					4	4	4	3	4	4	3	3	3	3	3	3	2	2	2
2020-08-10	28	1	1	PS190339292	PS190339291	0	1	0	2	20	2	2	1	1	0	0		20	2	0			1	4	1	1		0	0	0					1	1	1	1	1	5	5	5	2	1	1	1	1	1	1
2020-08-11	30	1	1	PS190339288	PS190339287	0	2	4	0	2	1	3	1	1	0	2	3	0		0			0		1	2		0	0	0					4	3	3	3	3	4	4	3	3	3	3	4	2	2	2
2020-08-16	26	1	1	PS190339432	PS190339431	0	1	2	0	2	0	3	1	1	0	0		4	3	0			0		1	4		0	0	0					1	2	2	2	2	5	5	5	1	1	1	1	1	1	1
2020-08-16	45	1	1	PS190339434	PS190339433	0	2	4	3	3	1	3	1	1	0	1	3	2	3	2	3	1	0		1	2		1	0	0					3	3	3	3	3	3	3	3	3	3	3	3	3	3	3
2020-08-18	26	1	1	PS190339440	PS190339439	0	2	4	2	2	2	3	1	1	1	0		0		0			0		1	2		0	0	0					5	5	5	4	4	3	3	2	1	1	3	3	4	4	3
2020-08-18	26	1	1	PS190339444	PS190339443	0	1	4	0	3	2	2	1	1	0	1	2	1	2	0			1	3	1	0	4	0	0	0					1	1	1	1	1	1	3	3	1	2	1	1	1	1	1
2020-08-18	27	1	1	PS190339446	PS190339445	0	1	3	0	1	0	3	1	0		1	3	0		0			0		1	2		0	0	0					5	1	1	1	1	5	5	5	1	1	1	1	1	1	1
2020-08-20	30	1	1	PS190339244	PS190339243	0	2	4	0	1	0	1	0	1	0	1	1	0		0			0		0					0					2	2	2	1	2	4	3	4	1	2	2	2	2	3	2
2020-08-20	24	1	1	PS190339442	PS190339441	0	1	3	0	15	0	2	0	1	0	1	1	14	2	0			1	4	1	0	4	0	0	0					3	4	3	3	3	4	3	3	3	3	3	3	3	2	3
2020-08-20	23	1	1	PS190339438	PS190339437	0	1	3	3	1	1	3	1	1	1	1	3	0		0			0		1	2		0	0	0					1	1	1	1	1	5	4	4	1	1	1	1	1	1	1
2020-08-23	31	1	1	PS190339246	PS190339245	0	0	2	0	1	0	3	1	0		0		1	3	0			0		1	2		1	0	0					3	3	3	3	3	3	3	3	3	3	3	3	3	3	3
2020-08-23	32	1	1	PS190339120	PS190339119	0	0	1	3	1	2	1	1	1	0	1	2	0		0			0		1	4		0	0	0					1	1	1	1	4	3	3	3	2	1	3	3	2	2	2
2020-08-23	38	1	1	PS190339124	PS190339123	2	1	2	0	2	2	3	1	1	0	2	3	0		0			1	2	1	1		0	0	0					3	3	3	3	3	3	3	3	3	3	3	3	3	3	3
2020-08-23	27	1	1	PS190339126	PS190339125	0	1	3	0	2	1	3	1	1	0	1	3	1	3	0			1	1	1	2		1	0	0					1	1	1	1	1	5	5	5	1	3	1	1	1	1	1
2020-08-23	24	1	1	PS190339118	PS190339117	0	1	0	0	2	2	3	1	0		1	3	1	3	0			1	1	1	0	4	0	0	0					3	1	1	4	3	5	5	5	1	1	1	1	1	1	1
2020-08-25	24	1	1	PS190339418	PS190339417	0	1	2	0	5	2	3	0	1	0	0		5	3	0			0		1	1		0	0	0					2	2	3	3	2	5	5	5	3	3	2	2	2	2	2
2020-08-25	37	1	1	PS190339316	PS190339315	0	1	1	2	2	1	1	1	0		0		2	1	0			0		1	2		0	0	0					3	2	2	2	2	4	3	4	2	2	2	2	2	2	2
2020-08-26	19	1	1	PS190339328	PS190339327	0	0	2	2	2	2	1	1	1	0	2	2	2	2	0			1	1	1	4		0	0	0					3	3	3	3	3	4	4	4	1	2	3	3	2	2	3
2020-08-26	18	1	1	PS190339338	PS190339337	0	0	1	0	3	0	2	1	1	1	0		0		0			1	0	1	2		0	0	0					3	1	1	2	3	4	4	5	3	3	3	3	3	3	3
2020-08-27	28	1	1	PS190339306	PS190339305	0	0	3	0	15	2	2	0	1	0	3	2	12	2	0			1	4	1	4		2	0	1	0	2	0	0	5	5	5	5	5	5	5	5	1	1	1	1	1	1	1
2020-08-27	18	1	1	PS190339310	PS190339309	0	1	2	3	2	2	2	1	1	0	0		0		0			0		0					0					1	2	1	1	1	3	4	3	3	3	3	3	3	3	2
2020-08-30	23	1	1	PS190339340	PS190339339	0	1	1	0	3	0	3	1	1	1	1	2	0		0			0		1	4		1	0	0					5	3	2	2	3	4	4	4	1	1	1	1	1	1	1
2020-08-30	24	1	1	PS190339324	PS190339323	0	1	1	3	2	2	3	1	0		0		0		0			0		1	2		0	0	0					3	3	3	3	3	3	4	4	2	2	2	2	2	2	2
2020-08-31	24	1	1	PS190339356	PS190339355	0	1	2	0	1	1	0	0	1	0	0		0		0			0		1	2		2	0	0					4	1	1	1	1	5	5	5	1	1	1	1	1	1	1
2020-09-01	23	1	1	PS190339358	PS190339357	0	0	0	0	1	2	3	1	1	0	0		0		0			0		1	2		2	0	0					3	2	3	2	2	4	4	4	2	3	2	2	2	2	2
2020-09-02	24	1	1	PS190339414	PS190339413	0	1	0	0	2	0	1	0	1	0	2	1	0		0			1	0	1	2		0	2	0					2	2	2	2	3	4	4	4	1	1	1	1	1	1	1
2020-09-02	23	1	1	PS190339416	PS190339415	0	0	3	3	1	1	1	0	1	0	0		0		0			0		1	1		2	0	0					4	2	3	1	2	3	3	3	2	2	2	3	3	2	2
2020-09-04	23	1	1	PS190339402	PS190339401	0	1	2	0	1	1	3	1	1	1	1	3	0		0			0		1	1		2	0	0					1	1	1	1	1	5	4	4	2	2	2	2	2	2	2
2020-09-06	46	1	1	PS190339412	PS190339411	1	0	4	2	5	2	3	1	1	1	0		5	3	0			0		1	4		2	0	0					3	3	3	3	3	3	4	4	2	2	3	3	3	3	3
2020-09-06	23	1	1	PS190339404	PS190339403	0	0	1	0	1	0	1	1	1	1	0		1	3	0			0		1	4		2	0	0					1	1	1	1	1	1	1	1	2	2	2	2	2	2	2
2020-09-06	45	1	1	PS190339426	PS190339425	1	0	2	2	1	1	3	1	1	0	0		1	3	1	0	0	0		1	2		2	0	0					3	2	4	3	2	3	3	4	1	1	3	3	3	3	3
2020-09-11	41	1	1	PS190339428	PS190339427	2	1	2	3	1	1	3	1	0		0		1	3	0			0		1	4		0	0	0					3	2	3	3	3	3	3	3	3	3	3	3	3	3	3
2020-09-12	22	1	1	PS190339448	PS190339447	0	1	2	2	5	2	2	1	1	0	2	2	3	3	0			0		1	0	4	0	0	0					4	3	2	3	2	4	4	4	2	2	1	2	2	2	2
2020-09-12	27	1	1	PS190339430	PS190339429	0	0	4	0	3	1	1	1	1	1	1	2	1	2	0			1	2	1	1		2	0	0					1	1	1	1	3	5	5	5	3	3	3	3	3	3	2
2020-09-13	31	1	1	PS190339410	PS190339409	0	1	3	0	10	1	3	1	1	0	1	3	9	3	0			0		1	0	4	0	0	0					2	2	2	2	2	4	4	4	3	3	3	3	3	3	3
2020-09-14	40	1	1	PS190339406	PS190339405	0	1	4	3	1	1	3	1	0		1	2	1	3	1	2	1	0		1	2		1	1	1	1	1	1	0	2	2	2	2	2	4	4	4	1	2	2	2	2	2	2
2020-09-14	26	1	1	PS190339360	PS190339359	0	0	0	0	3	1	2	1	1	0	2	2	1	3	0			0		1	0	0	0	0	0					4	2	2	4	2	4	3	3	3	3	3	3	3	2	1
2020-09-14	45	1	1	PS190339450	PS190339449	1	0	3	2	2	2	2	1	1	0	2	2	0		1	3	1	0		0					0					3	3	3	2	3	3	3	3	1	1	1	1	1	1	2
2020-09-14	27	1	1	PS190339116	PS190339115	0	1	2	2	1	1	3	1	1	1	0		4	3	0			0		1	2		1	0	0					1	2	1	1	1	4	3	3	2	2	3	2	1	1	1
2020-09-14	26	1	1	PS190339354	PS190339353	0	1	4	2	1	2	1	1	1	1	0		1	3	0			0		1	2		0	0	0					1	2	4	3	4	4	3	3	3	3	3	3	3	3	3
2020-09-14	25	1	1	PS190339350	PS190339349	0	1	1	2	2	1	3	1	1	1	0		2	2	0			0		0					0					1	1	2	1	1	4	3	3	2	2	2	2	2	2	2
2020-09-16	36	1	1	PS190339162	PS190339161	0	1	3	0	4	1	3	0	1	0	1	2	3	3	0			0		1	1		1	0	0					3	3	1	3	1	5	4	4	3	3	3	3	3	3	3
2020-09-17	24	1	1	PS190339166	PS190339165	0	1	4	0	1	0	2	0	1	0	1	2	0		0			0		1	4		0	0	0					2	1	1	1	1	5	5	5	1	1	1	1	1	1	1
2020-09-20	28	1	1	PS190339408	PS190339407	0	1	4	0	1	0	0	0	1	0	1	0	1	1	0			0		1	0	0	2	0	0					1	2	1	1	1	4	4	4	3	3	3	3	3	3	3
2020-09-20	33	1	1	PS190339160	PS190339159	0	1	4	0	3	2	3	1	1	1	0		3	3	0			0		1	1		2	0	0					1	1	1	1	2	4	3	3	2	3	3	3	2	2	2
2020-09-20	24	1	1	PS190339424	PS190339423	0	0	3	0	5	2	3	1	1	0	2	3	3	3	0			0		1	2		2	0	0					2	2	2	2	2	4	4	4	2	2	2	2	2	2	2
2020-09-20	40	1	1	PS190339130	PS190339129	2	2	4	2	1	2	2	1	1	0	1	2	0		1	3	1	1	2	1	1		2	0	0					1	2	1	1	4	4	4	4	2	2	3	4	2	1	1
2020-09-20	32	1	1	PS190339122	PS190339121	2	0	2	1	1	2	3	1	1	1	1	3	1	3	1	1	0	0		1	1		2	0	0					5	1	1	1	1	3	3	3	3	3	3	3	3	3	3
2020-09-20	35	1	1	PS190339128	PS190339127	1	1	3	2	1	1	3	1	0		1	3	0		1	3	0	0		1	0	4	2	0	0					1	3	3	3	3	4	4	4	3	2	3	3	3	2	3
2020-09-20	24	1	1	PS190339348	PS190339347	0	1	3	0	2	0	3	1	1	0	0		2	3	0			0		1	1		2	0	0					3	3	3	3	3	3	3	3	4	4	3	3	3	4	2
2020-09-20	45	1	1	PS190339400	PS190339399	0	0	1	0	1	1	2	1	1	0	0		0		0			0		1	1		0	0	1	1	0	0	0	1	2	3	3	3	2	3	4	3	1	2	3	2	1	2
2020-09-20	46	1	1	PS190339366	PS190339365	1	0	1	3	1	2	2	1	1	0	1	2	0		1	0	0	0		0					0					2	3	4	2	2	5	4	4	2	2	2	2	1	2	2
2020-09-20	26	1	1	PS190339386	PS190339385	0	1	2	0	3	2	3	1	1	0	0		0		0			0		1	0	4	1	0	0					3	3	3	3	3	3	3	3	3	3	3	3	3	3	3
2020-09-20	23	1	1	PS190339388	PS190339387	0	1	0	0	1	1	3	0	1	1	1	3	0		0			0		1	2		2	0	0					3	3	3	3	3	3	3	3	3	3	3	3	3	3	3
2020-09-23	32	1	1	PS190339320	PS190339319	0	1	2	0	3	1	3	1	1	0	0		3	2	0			0		1	4		0	0	1	2	0	0	0	3	3	3	3	3	3	3	3	2	2	2	2	2	2	2
2020-09-25	28	1	1	PS190339368	PS190339367	0	1	3	0	1	1	3	1	1	1	1	3	1	3	0			0		1	4		0	0	0					1	3	4	3	3	5	5	5	2	2	3	3	3	3	4
2020-09-26	36	1	1	PS190339436	PS190339435	0	0	2	0	3	2	3	1	0		0		3	3	0			0		1	2		0	0	0					1	1	1	1	1	4	4	4	1	3	1	3	3	2	2
2020-09-27	52	1	1	PS190339364	PS190339363	1	0	2	2	3	2	2	1	1	0	0		3	2	1	2	1	0		0					0					3	4	5	2	4	4	4	4	1	3	3	2	3	3	4
2020-09-27	28	1	1	PS190339322	PS190339321	0	0	2	0	5	2	2	0	1	0	2	2	3	2	0			0		1	2		1	0	1	1	1	0	0	1	1	1	1	1	4	4	4	1	1	1	1	1	1	1
2020-09-27	20	1	1	PS190339344	PS190339343	0	0	2	0	4	0	1	0	1	0	1	1	3	3	0			1	2	1	0	0	0	0	1	3	0	0	0	3	2	3	2	2	5	4	4	3	3	3	3	3	4	2
2020-09-30	21	1	1	PS190339352	PS190339351	0	1	0	0	4	2	3	1	1	0	0		4	3	0			0		1	0	0	2	0	0					1	1	3	3	3	1	1	1	3	3	3	3	1	3	3
2020-09-30	22	1	1	PS190339318	PS190339317	0	1	2	2	4	1	3	1	1	0	1	3	3	3	0			0		1	4		2	0	0					2	2	2	2	4	4	4	4	1	1	1	1	1	1	1
2020-09-30	18	1	1	PS190339330	PS190339329	0	0	2	2	1	2	1	0	1	0	1	1	1	1	0			0		1	0	4	0	0	0					3	3	3	3	3	3	3	3	3	3	3	3	3	3	3
2020-10-05	28	1	1	PS190339164	PS190339163	0	1	4	2	3	1	3	1	1	0	3	0	0		1	3	1	1	0	1	2		0	2	0					1	1	1	1	1	5	3	5	1	1	1	1	1	1	1
2020-10-06	42	1	1	PS190339248	PS190339247	1	0	3	0	2	1	3	1	0		0		2	3	0			0		0					0					2	2	2	2	2	4	2	4	1	1	2	2	3	1	2
2020-10-06	27	1	1	PS190339392	PS190339391	0	0	3	0	1	0	2	1	1	0	0		1	2	2	3	1	0		1	2		2	0	0					3	3	4	4	4	3	4	3	2	3	2	2	3	2	2
2020-10-07	28	1	1	PS190339370	PS190339369	0	2	4	0	3	2	1	0	1	0	3	1	3	1	0			0		1	1		2	0	0					1	2	2	4	4	4	2	4	3	3	3	4	3	4	4
2020-10-07	24	1	1	PS190339396	PS190339395	0	1	4	0	5	2	2	1	1	0	1	0	4	3	0			1	4	1	0	0	0	0	0					2	3	1	4	2	4	3	3	2	3	2	2	2	1	1
2020-10-07	25	1	1	PS190339398	PS190339397	0	2	4	0	3	2	2	1	1	0	1	3	2	0	0			0		1	0	0	0	0	0					1	1	3	3	4	2	1	4	2	1	1	3	2	1	1
2020-10-07	27	1	1	PS190339384	PS190339383	0	1	3	0	2	1	2	1	1	0	2	2	0		0			1	1	1	4		2	0	0					1	1	1	1	1	4	3	1	2	2	2	1	2	2	2
2020-10-07	22	1	1	PS190339332	PS190339331	0	1	0	0	1	2	1	1	1	1	0		0		0			0		0					0					3	3	3	3	3	3	3	3	2	2	2	2	3	2	2
2020-10-07	19	1	1	PS190339304	PS190339303	0	1	0	0	1	2	3	1	1	0	1	3	0		0			0		0					0					1	1	1	1	2	5	5	5	1	2	1	1	1	1	1
2020-10-08	35	1	1	PS190339382	PS190339381	0	1	4	0	2	1	3	1	1	0	2	3	0		0			0		1	2		0	0	0					5	5	3	3	3	4	4	5	1	2	4	1	4	4	4
2020-10-08	31	1	1	PS190339362	PS190339361	0	1	4	0	1	0	3	1	1	0	1	3	1	3	0			0		1	2		0	0	0					1	1	1	1	1	4	4	4	1	1	1	1	1	1	1
2020-10-08	29	1	1	PS190339394	PS190339393	0	1	2	0	3	2	3	1	1	1	1	3	3	3	0			0		1	2		0	0	0					5	1	1	1	3	5	5	5	2	3	2	2	2	2	2
2020-10-09	20	1	1	PS190339390	PS190339389	0	0	2	0	4	2	2	1	1	0	1	3	5	2	0			1	4	1	2		2	0	0					3	3	3	4	3	4	3	3	3	3	3	3	3	2	2
2020-10-09	30	1	1	PS190339380	PS190339379	0	1	3	0	4	0	3	1	1	1	2	3	2	3	0			0		1	0	0	1	0	0					3	1	1	1	3	3	4	4	3	3	3	3	3	3	1
2020-10-11	24	1	1	PS190339376	PS190339375	0	1	3	0	1	2	3	1	1	0	0		2	3	0			0		1	0	0	0	0	0					1	1	1	1	1	5	4	5	1	1	1	1	1	1	1
2020-10-11	29	1	1	PS190339422	PS190339421	0	1	4	0	3	2	2	0	1	0	3	2	0		0			0		1	2		1	0	0					3	3	3	3	3	3	3	3	1	1	3	3	2	2	2
2020-10-12	20	1	1	PS190339336	PS190339335	0	1	0	0	4	0	1	1	1	1	0		4	1	0			1	1	1	4		0	0	1	2	0	0	0	1	1	1	1	1	1	3	3	4	3	3	3	3	3	3
2020-10-12	35	1	1	PS190339342	PS190339341	0	1	4	0	2	2	2	1	1	0	1	3	1	3	0			1	0	1	2		0	0	0					3	3	4	3	3	5	5	5	1	1	1	1	1	1	1
2020-10-19	31	1	1	PS190339312	PS190339311	0	0	3	0	2	1	3	1	1	0	0		0		0			0		1	2		0	0	0					3	3	3	3	3	3	2	3	2	2	3	4	3	3	4
2020-10-26	27	1	1	PS190339308	PS190339307	0	0	2	0	1	1	3	1	1	1	1	3	0		0			0		1	4		2	0	0					4	1	2	1	1	5	5	5	1	1	1	1	1	1	1
2020-10-28	31	1	1	PS190339374	PS190339373	0	1	4	0	2	0	3	1	1	0	0		2	3	0			0		1	1		0	0	0					1	1	1	1	1	5	5	5	3	3	3	3	3	3	3
[truncated: 11 more columns]
